# Supplementary material for: Structure and mechanism of the Mrp complex, an ancient cation/proton antiporter
Source: eLife journal article supplement (doi:10.7554/elife.59407), 2020-07-31
Supplement: supp [file elife-59407-supp-v1.zip]

Archive with 11 entries (11 files):
- elife_poa_e59407_Transparent_Reporting_File.pdf
- elife_poa_e59407_Figure_1_figure_supplement_1.pdf
- elife_poa_e59407_Figure_1_figure_supplement_2.pdf
- elife_poa_e59407_Figure_1_figure_supplement_3.pdf
- elife_poa_e59407_Figure_1_figure_supplement_4.pdf
- elife_poa_e59407_Figure_2_figure_supplement_1.pdf
- elife_poa_e59407_Figure_4_figure_supplement_1.pdf
- elife_poa_e59407_Figure_4_figure_supplement_2.pdf
- elife_poa_e59407_Figure_4_figure_supplement_3.pdf
- elife_poa_e59407_Figure_4_figure_supplement_4.pdf
- elife_poa_e59407_Supplementary_file_1.docx
