# Supplementary material for: Structure and mechanism of the Mrp complex, an ancient cation/proton antiporter
Source: eLife journal article supplement (doi:10.7554/elife.59407), 2020-07-31
Supplement: supp [file elife-59407-supp-v1.zip › elife_poa_e59407_Figure_1_figure_supplement_2.pdf]

Collected 1544 movies

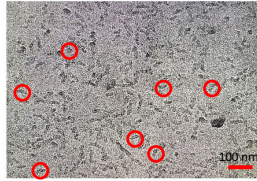

↓ Motioncorr2 and CTFFind

Selected 1255 good micrographs

↓ Autopicking

gCTF

226371 particles, pixel size 1.68 Å

↓ 2D classification

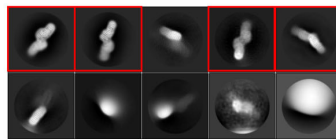

↓ Select four dimer classes

150138 particles extracted

↓ 3D classification

T=4, symmetry: C1

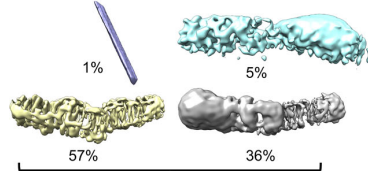

140351 particles, pixel size 0.84 Å

Expand particles in C2

Invert hand, 3D classification

272878 particles extracted, pixel size 0.84 Å

↓ 3D classification

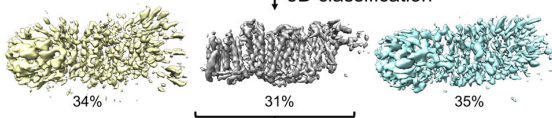

83340 particles extracted, pixel size 0.84 Å

3D auto-refinement, post processing

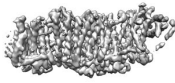

Invert hand, polishing, 3D auto-refinement

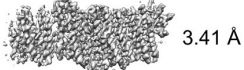

3.41 Å

T=4, symmetry: C1

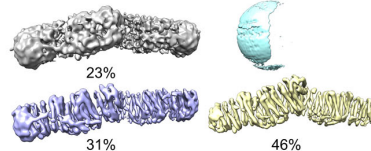

Select one class

89240 particles extracted

↓ 3D classification

T=4, symmetry: C1

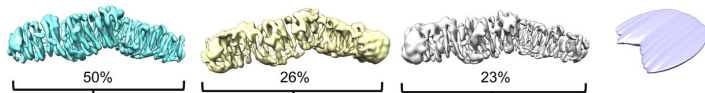

Selected three classes individually

10125 particles

21450 particles

25395 particles

3D auto-refinement, post-processing

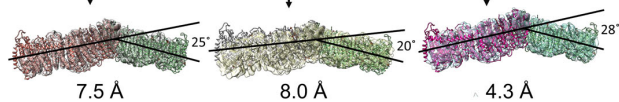

7.5 Å

8.0 Å

4.3 Å
