# Supplementary material for: Structure and mechanism of the Mrp complex, an ancient cation/proton antiporter
Source: eLife journal article supplement (doi:10.7554/elife.59407), 2020-07-31
Supplement: supp [file elife-59407-supp-v1.zip › elife_poa_e59407_Figure_1_figure_supplement_3.pdf]

Collected 760 movies for notSR and 3126 movies for SR

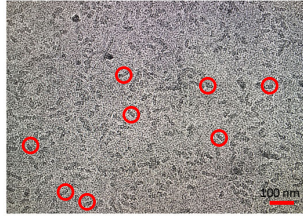

↓ Motioncorr2 and CTFFind  
Selected 3851 good micrographs  
↓ Autopicking  
gCTF

892069 particles extracted  
↓ 3D classification

T=4, pixel size = 1.68 Å, symmetry: C1

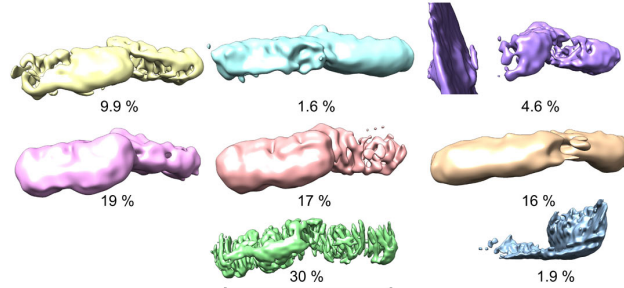

Pixel size 0.84 Å,  
3D auto-refinement

264961 particles

Pixel size 1.68 Å,  
3D classification

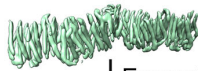

↓ Expand particles in C2, extract

524312 particles, pixel size 0.84 Å  
↓ 3D classification

T=4

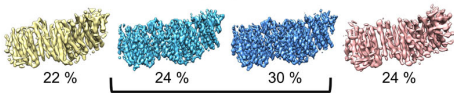

285688 particles, pixel size = 0.84 Å  
↓ 3D auto-refinement

3.16 Å

↓ Post processing

3.1 Å

↓ Polish, 3D auto-refinement

3.05 Å

↓ Post processing

2.98 Å  
285688 particles

T=4, symmetry: C1

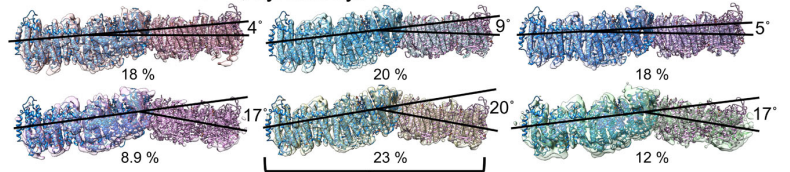

59328 particles, pixel size = 0.84 Å  
↓ 3D auto-refinement

symmetry: C2

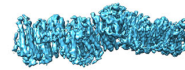

↓ Post processing

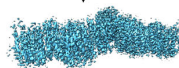

3.7 Å  
59328 particles
