# Supplementary figures and images for: Structure and mechanism of the Mrp complex, an ancient cation/proton antiporter
Source: eLife journal article supplement (doi:10.7554/elife.59407), 2020-07-31

## MrpD

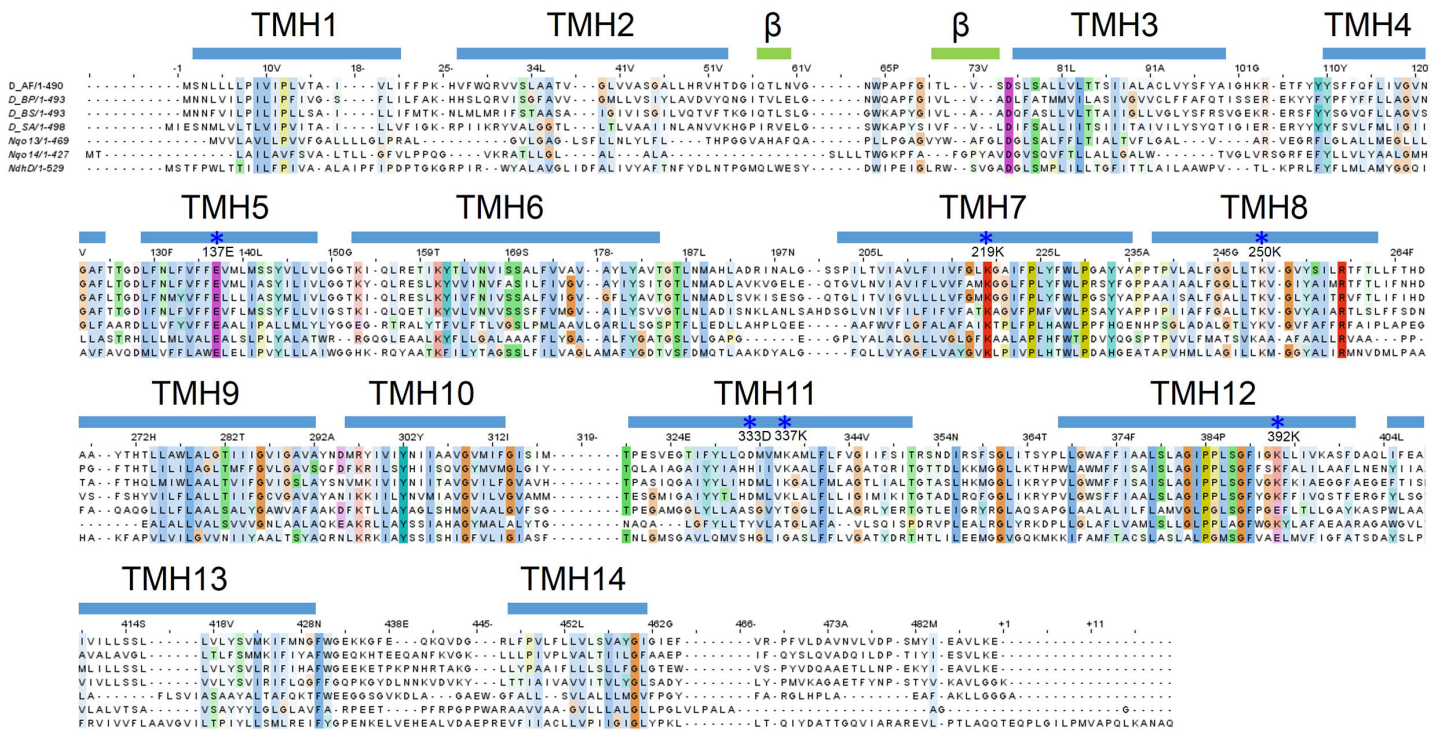

## MrpE

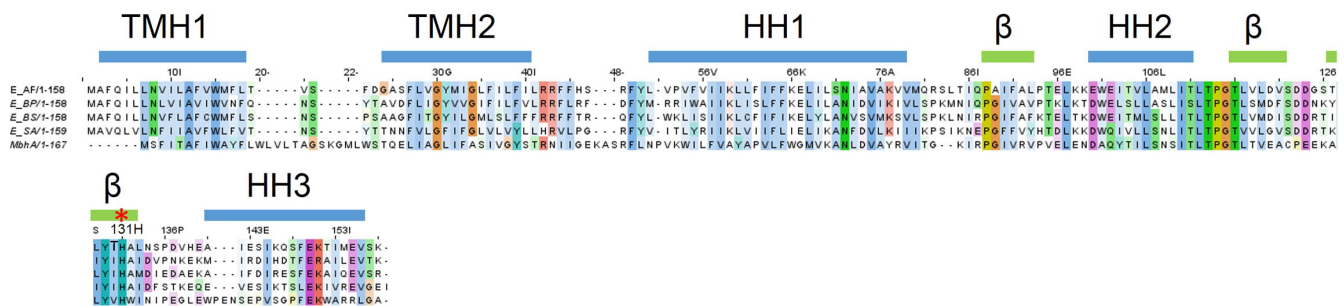

## MrpF

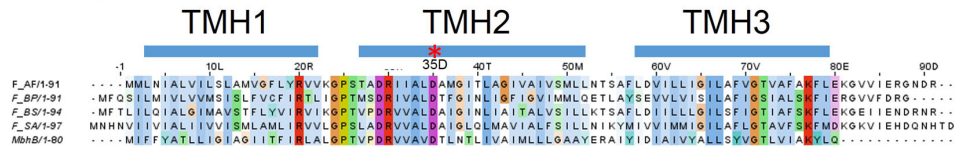

## MrpG

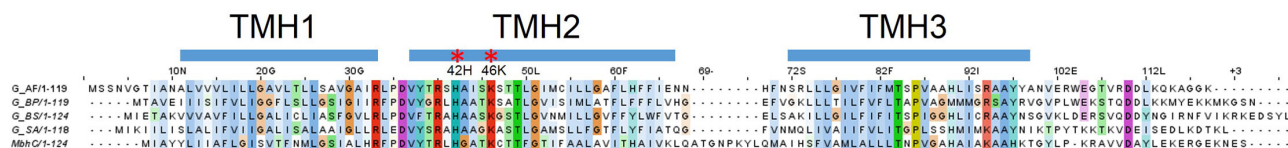

Supplement: supp [file elife-59407-supp-v1.zip]

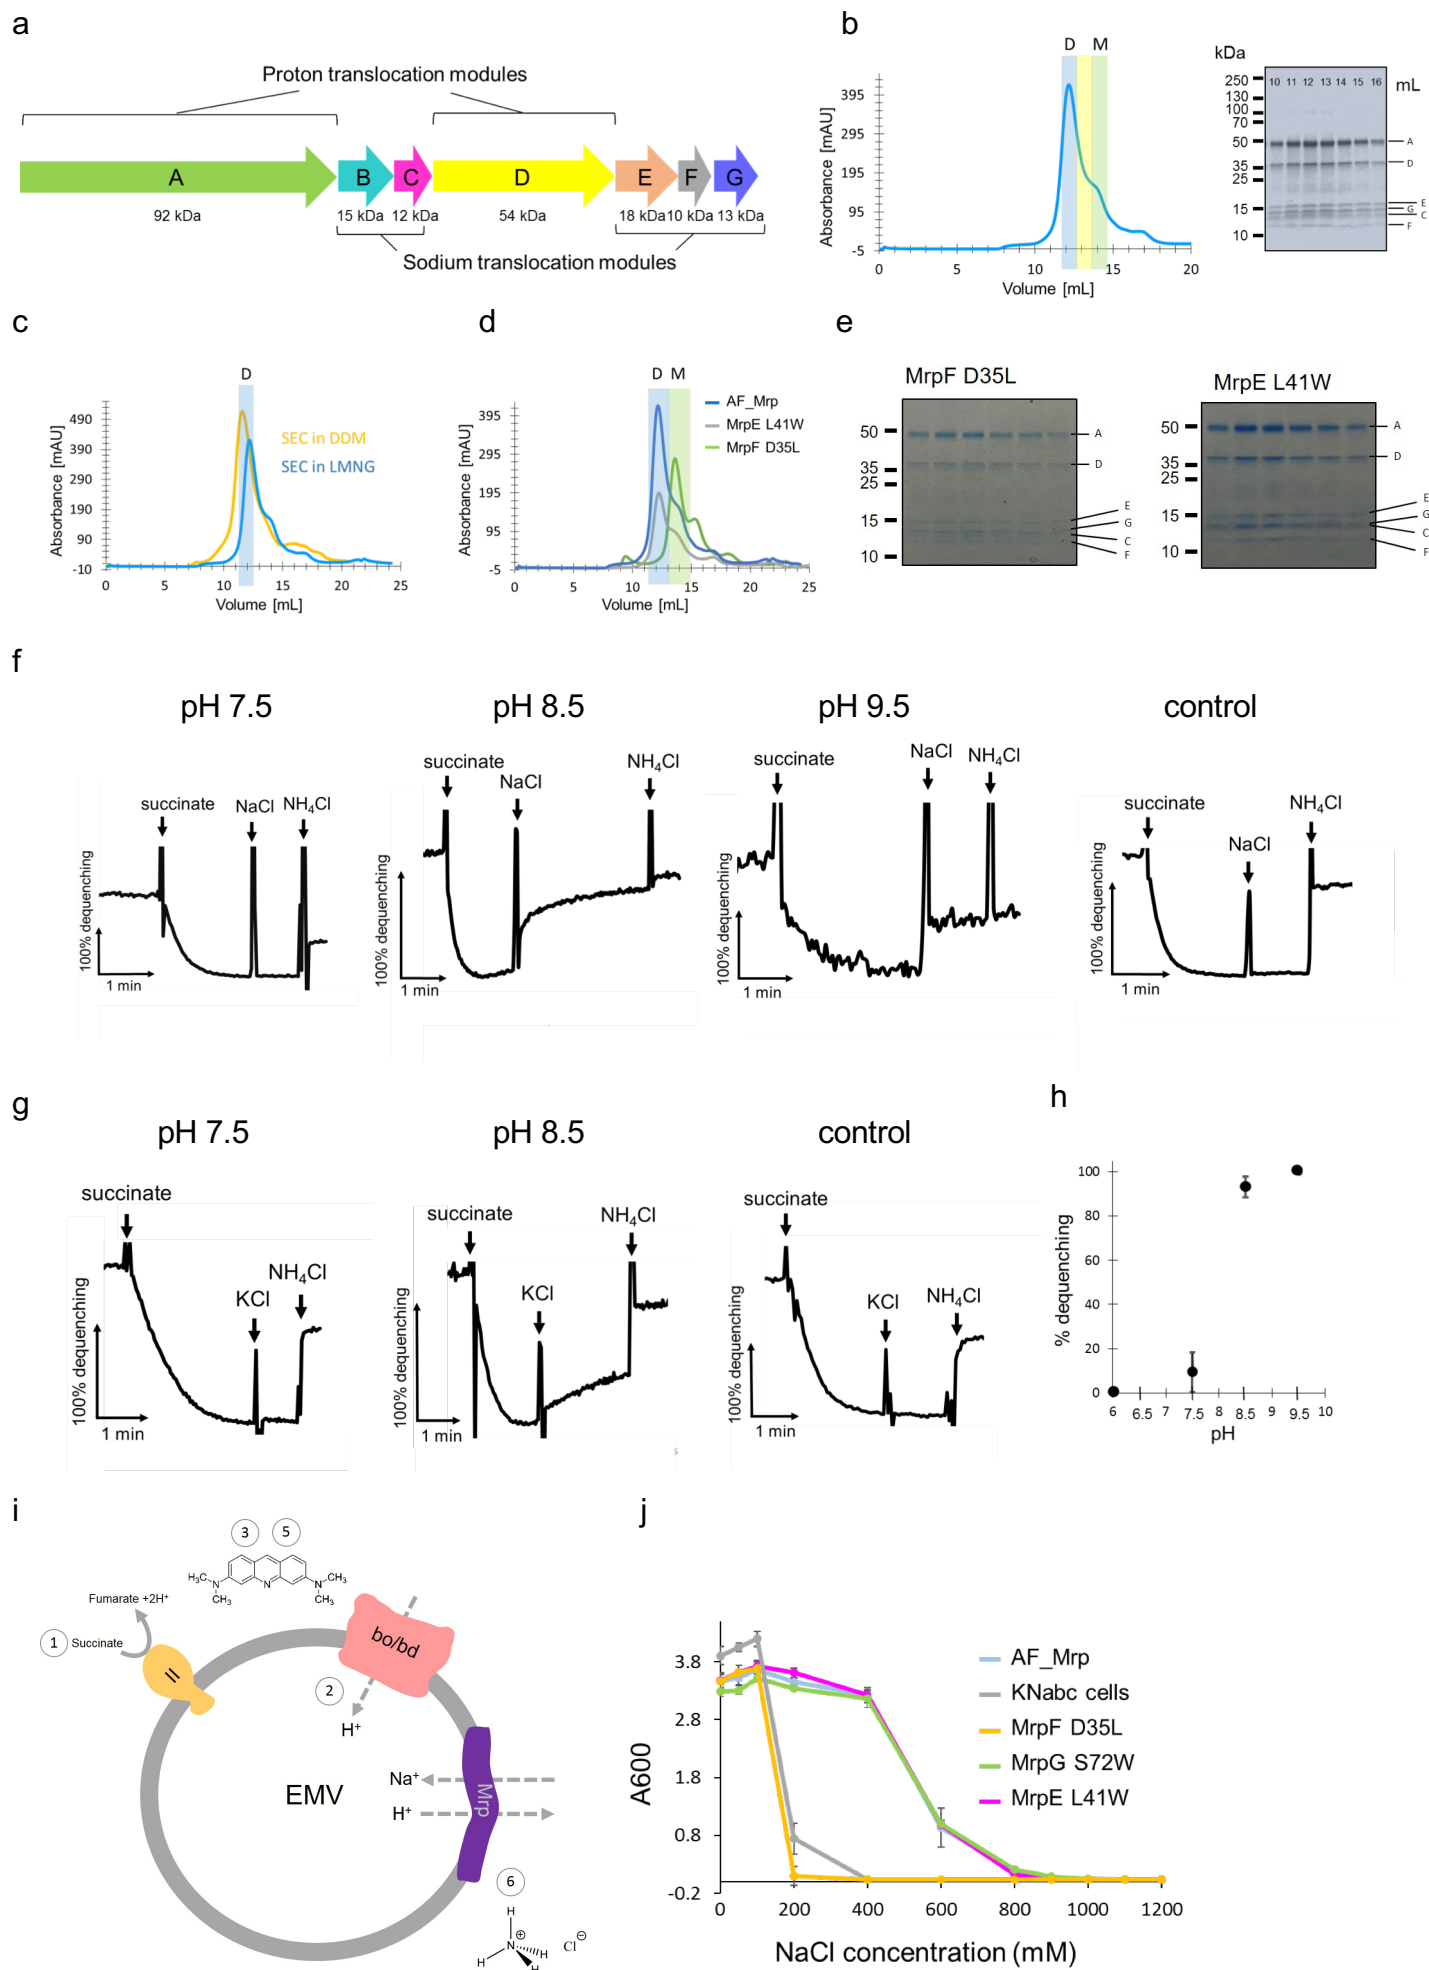

Supplement: supp [file elife-59407-supp-v1.zip › elife_poa_e59407_Figure_1_figure_supplement_1.pdf]

**a**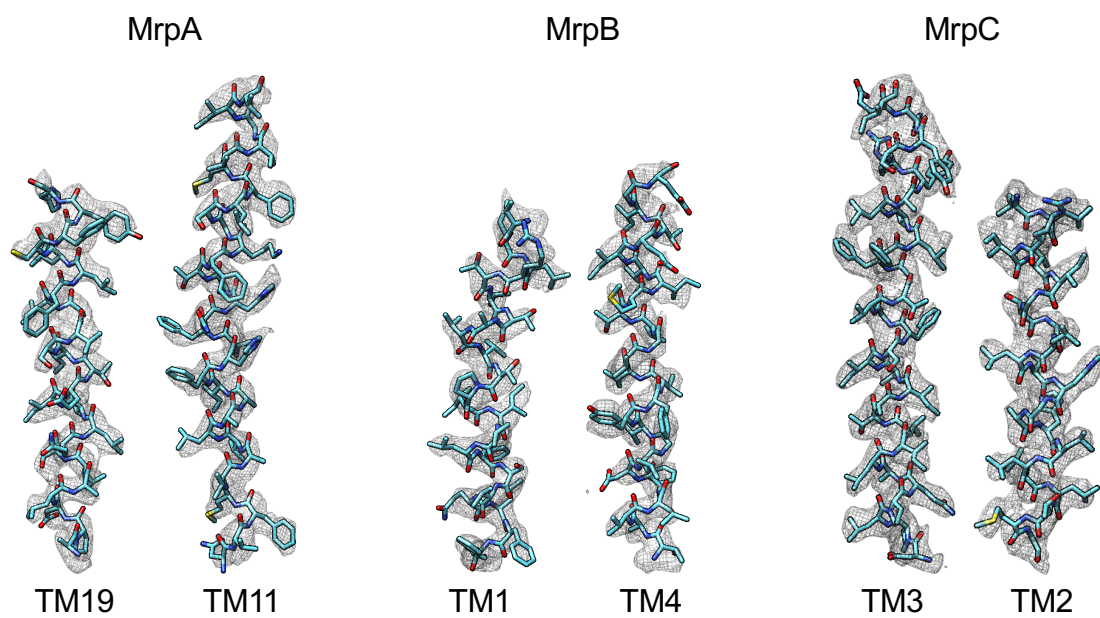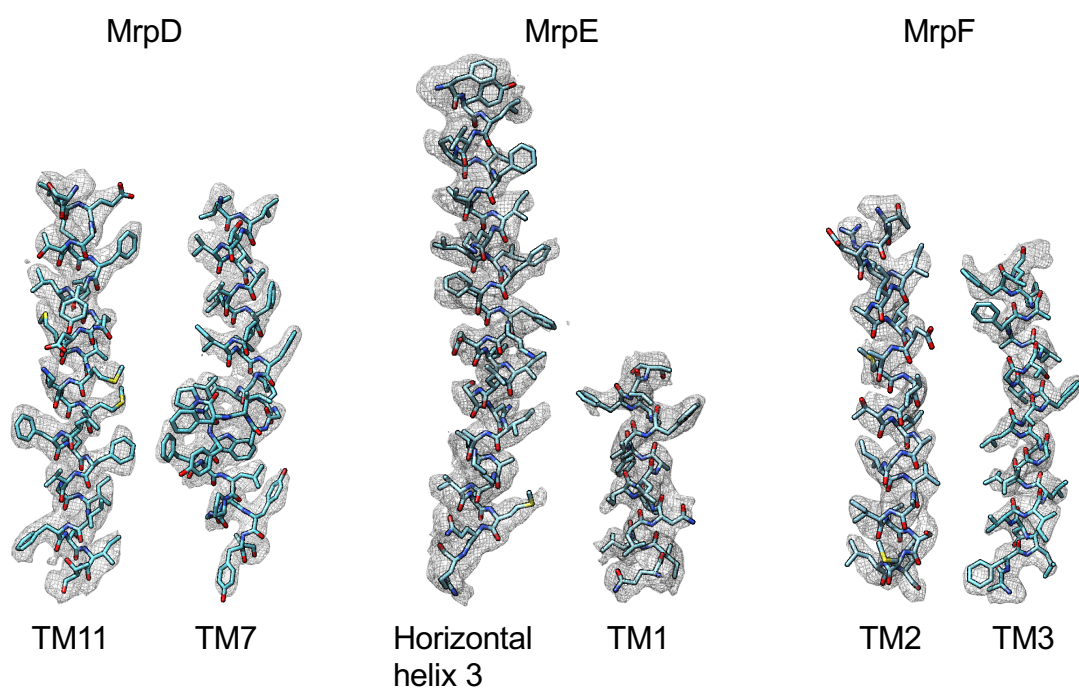**c**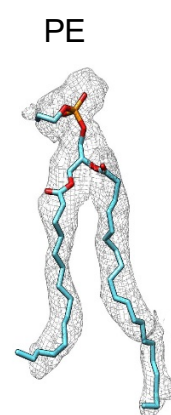**b**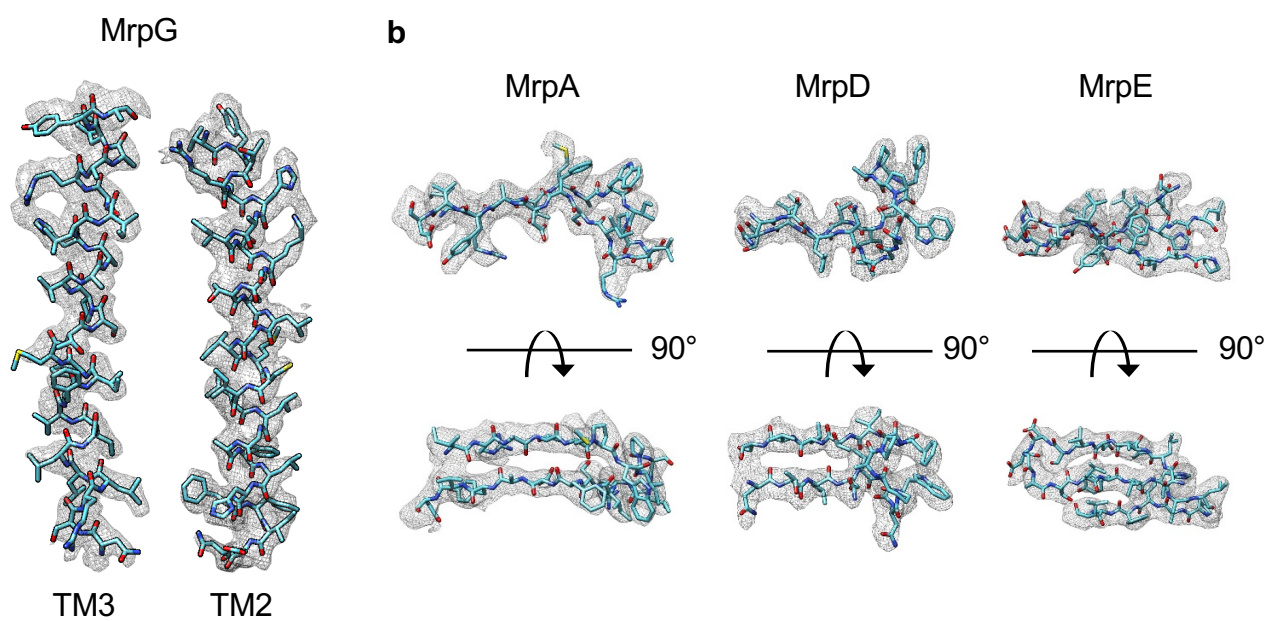

Supplement: supp [file elife-59407-supp-v1.zip › elife_poa_e59407_Figure_1_figure_supplement_4.pdf]

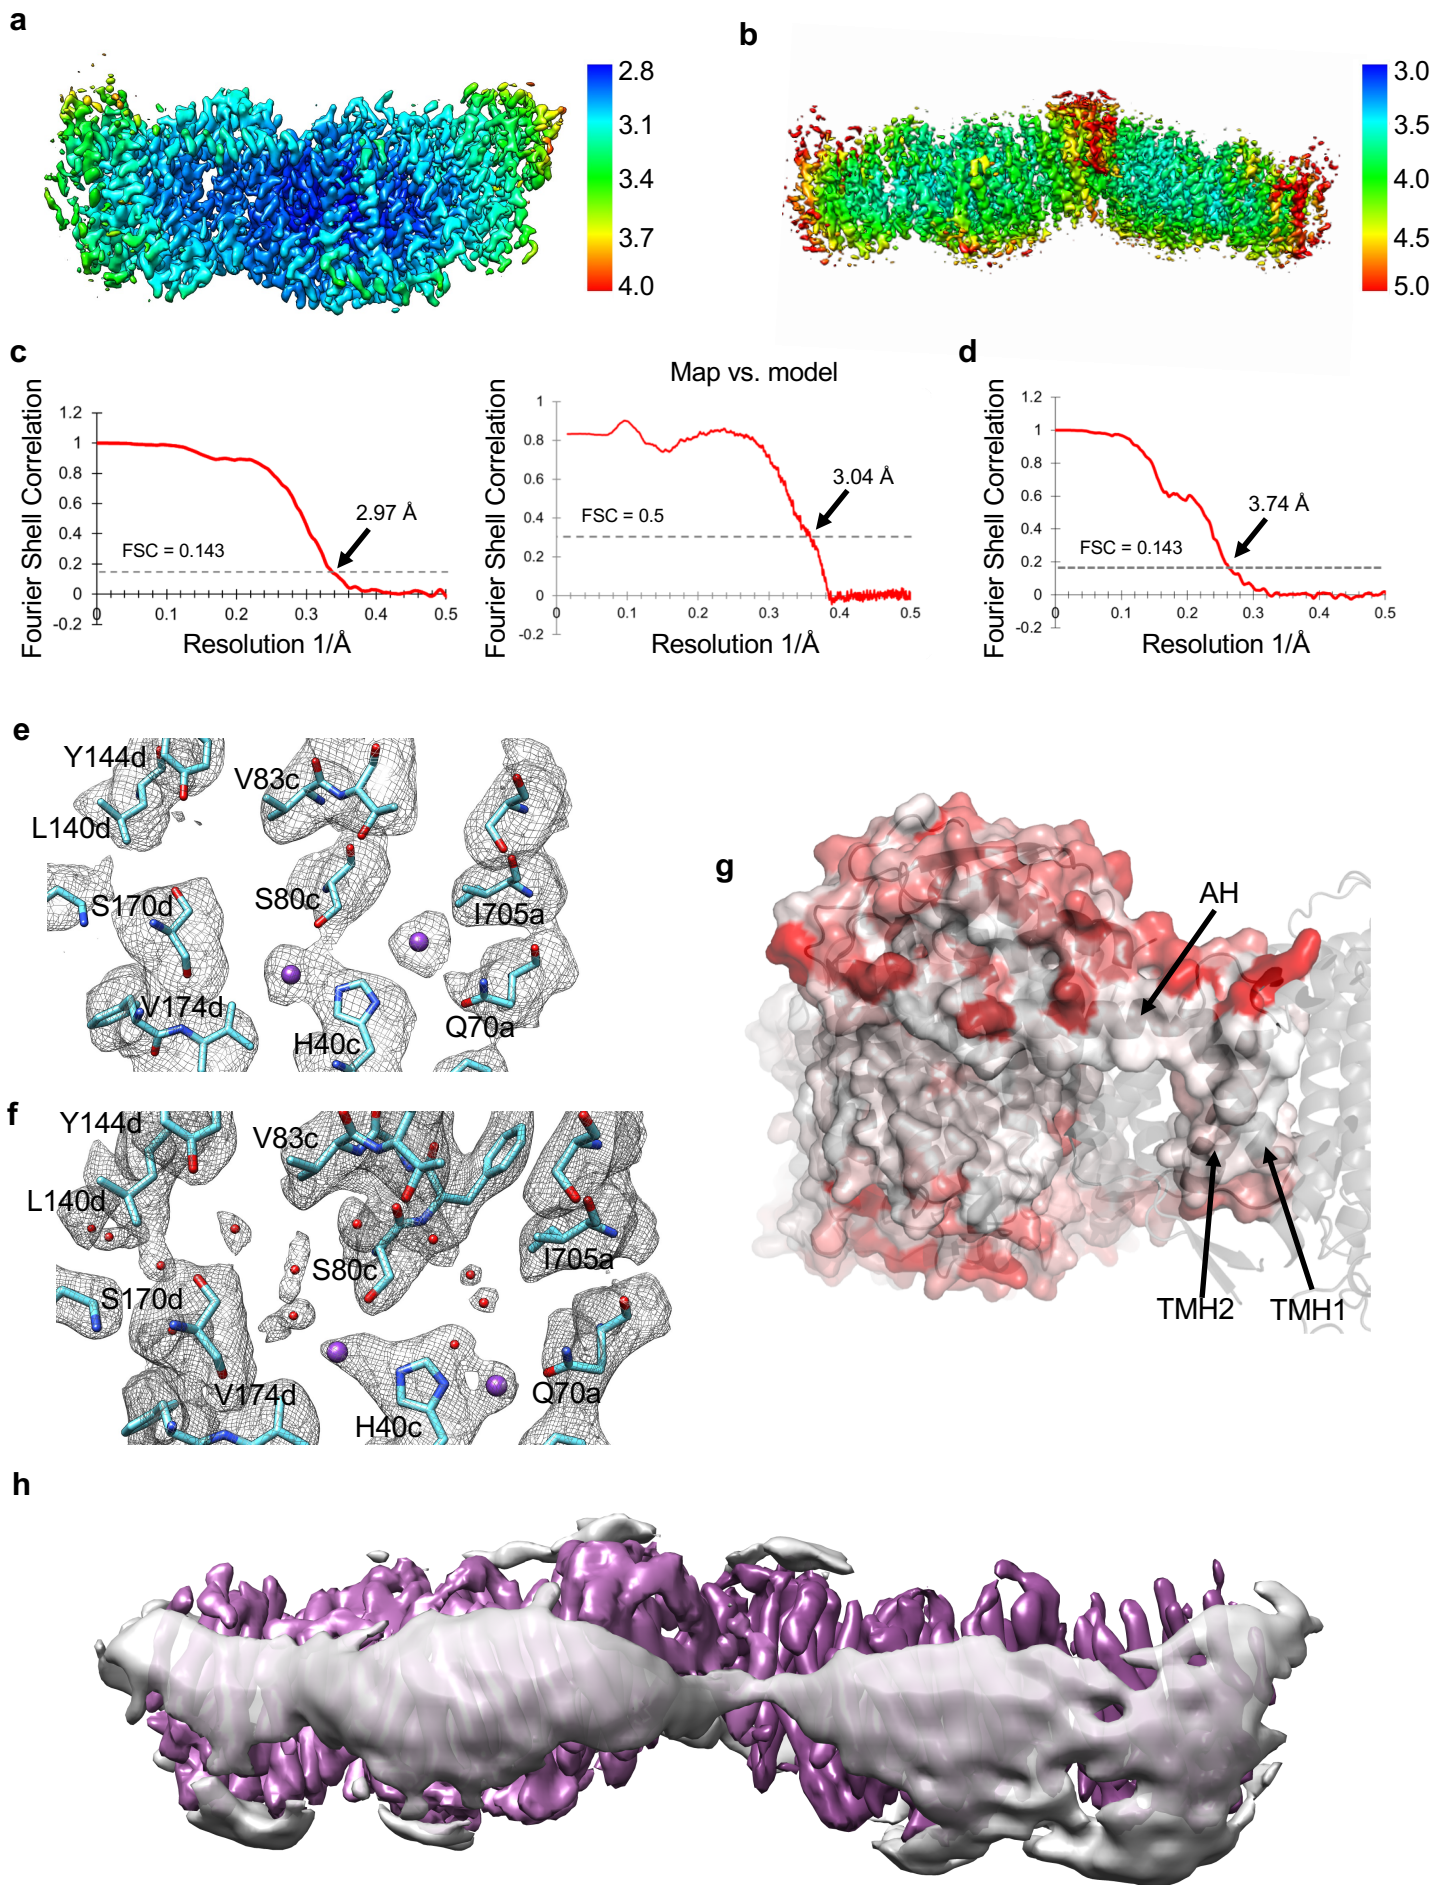

Supplement: supp [file elife-59407-supp-v1.zip › elife_poa_e59407_Figure_2_figure_supplement_1.pdf]

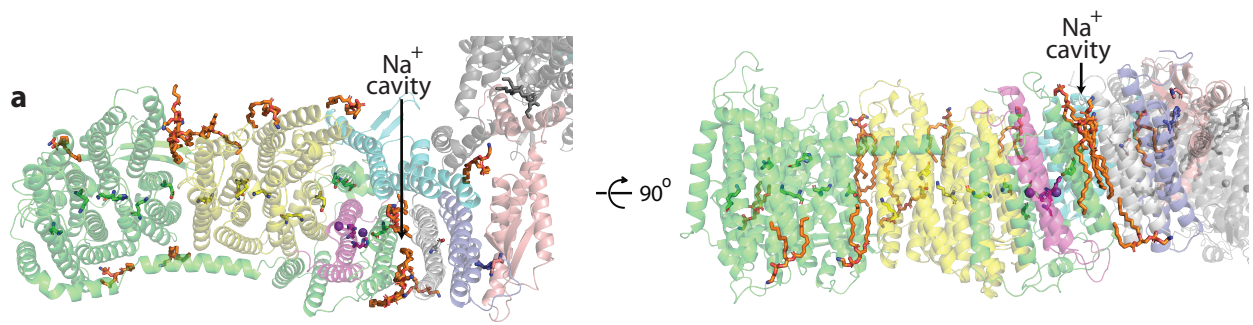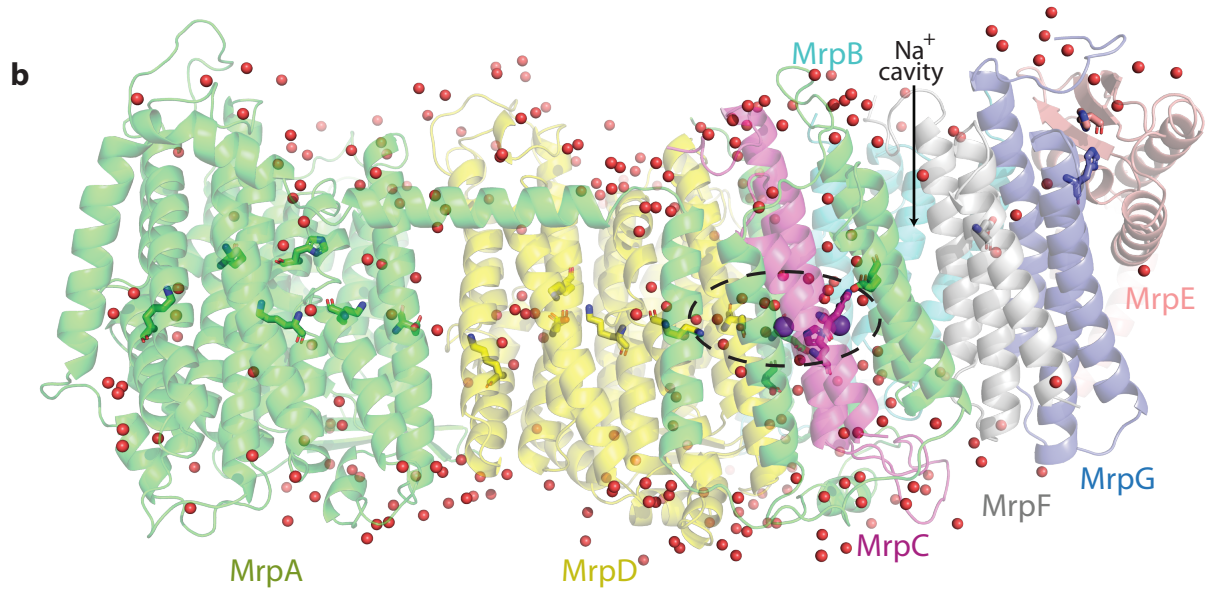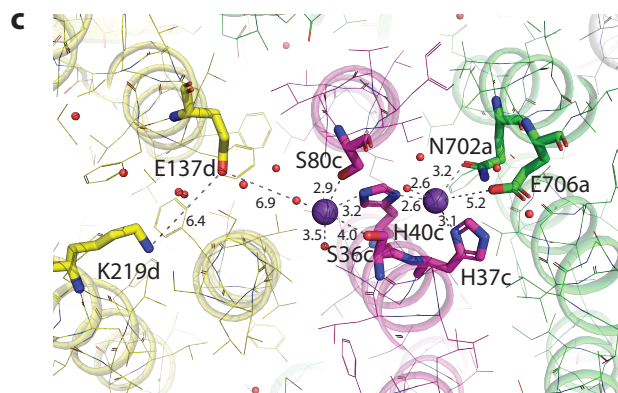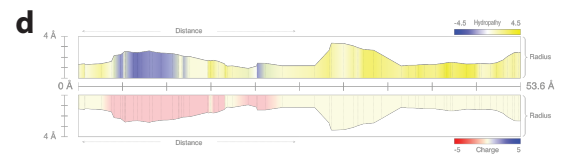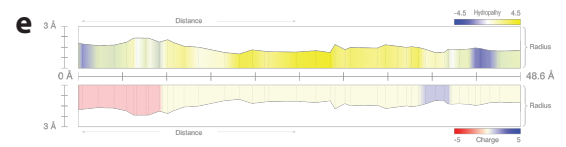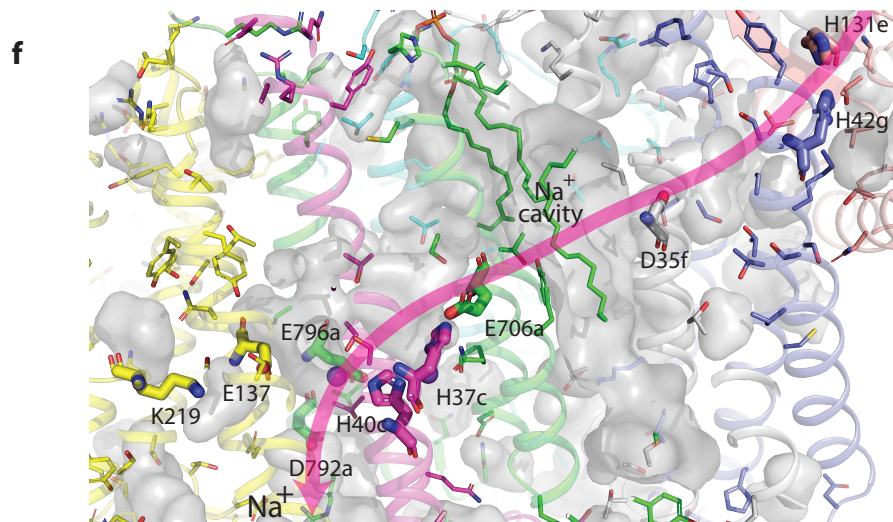

Supplement: supp [file elife-59407-supp-v1.zip › elife_poa_e59407_Figure_4_figure_supplement_1.pdf]

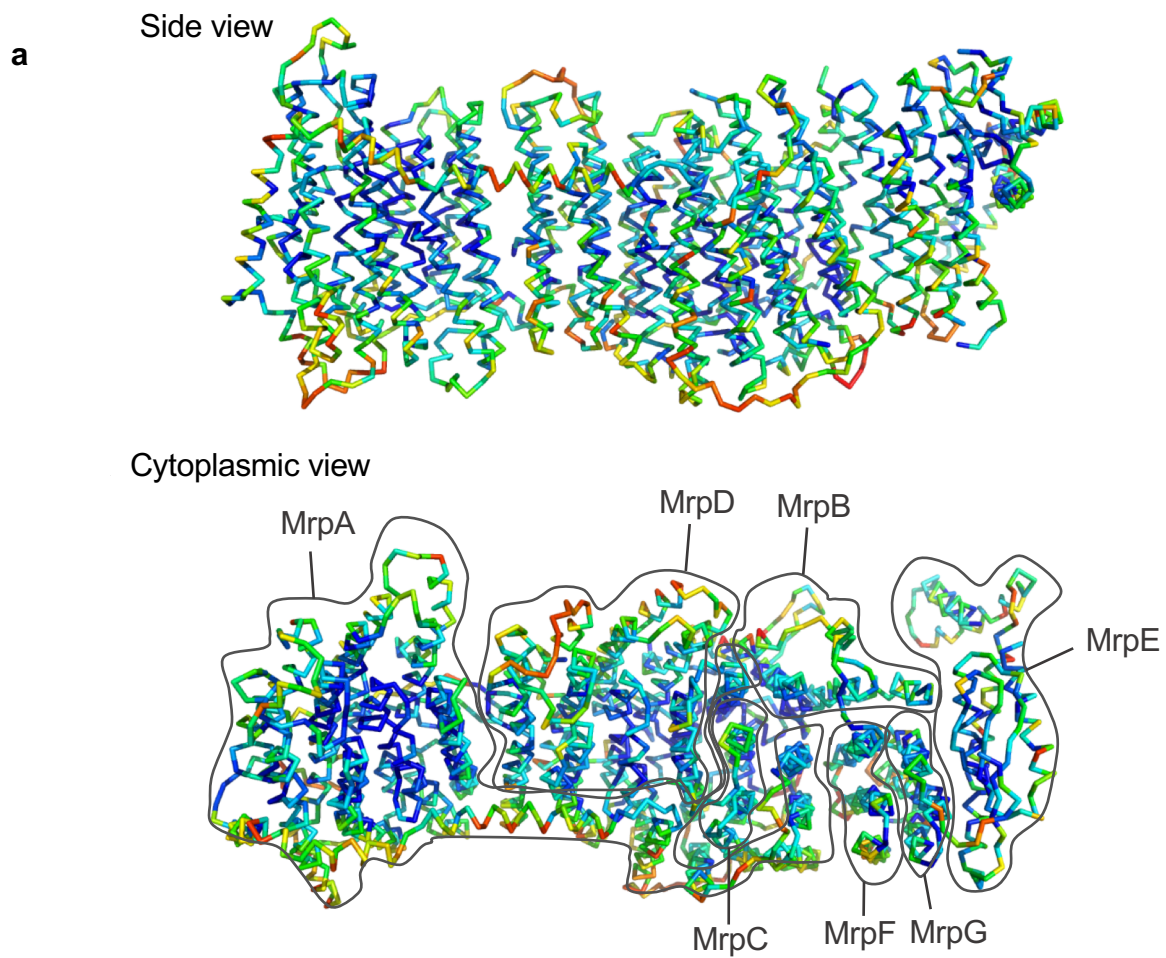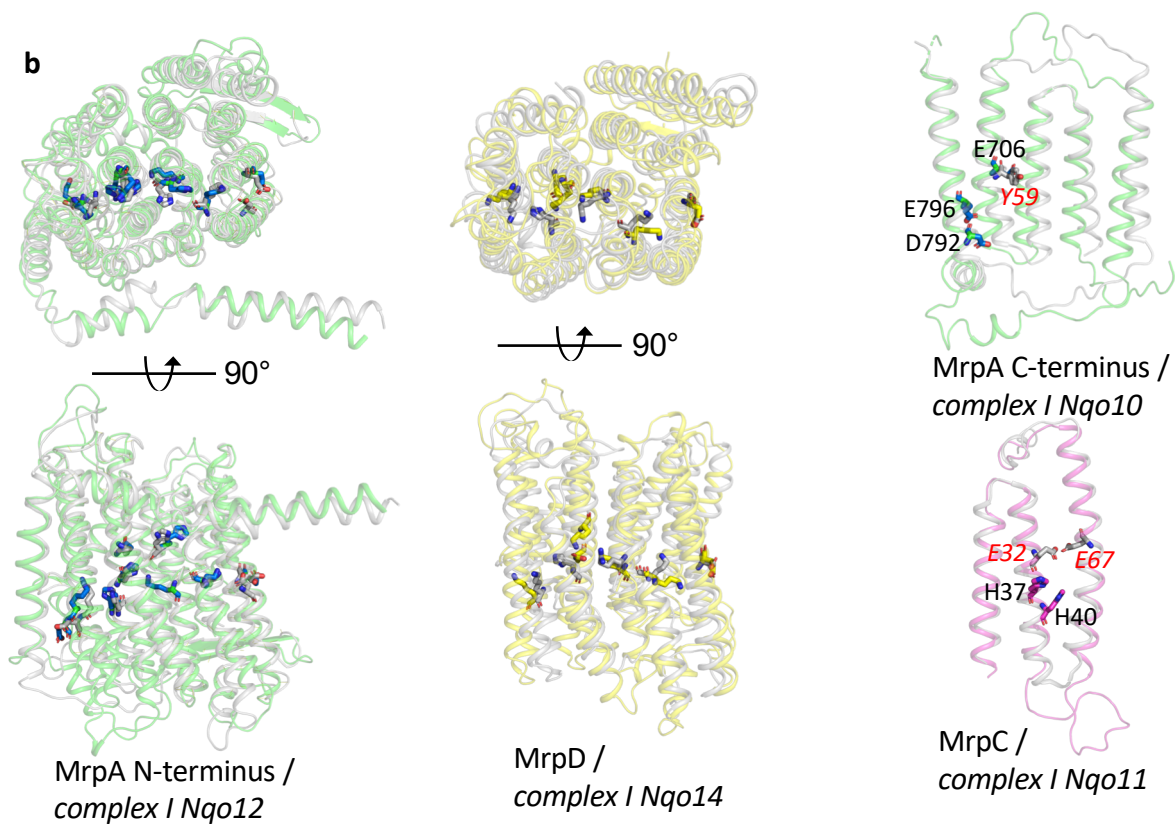

Supplement: supp [file elife-59407-supp-v1.zip › elife_poa_e59407_Figure_4_figure_supplement_2.pdf]

MrpA

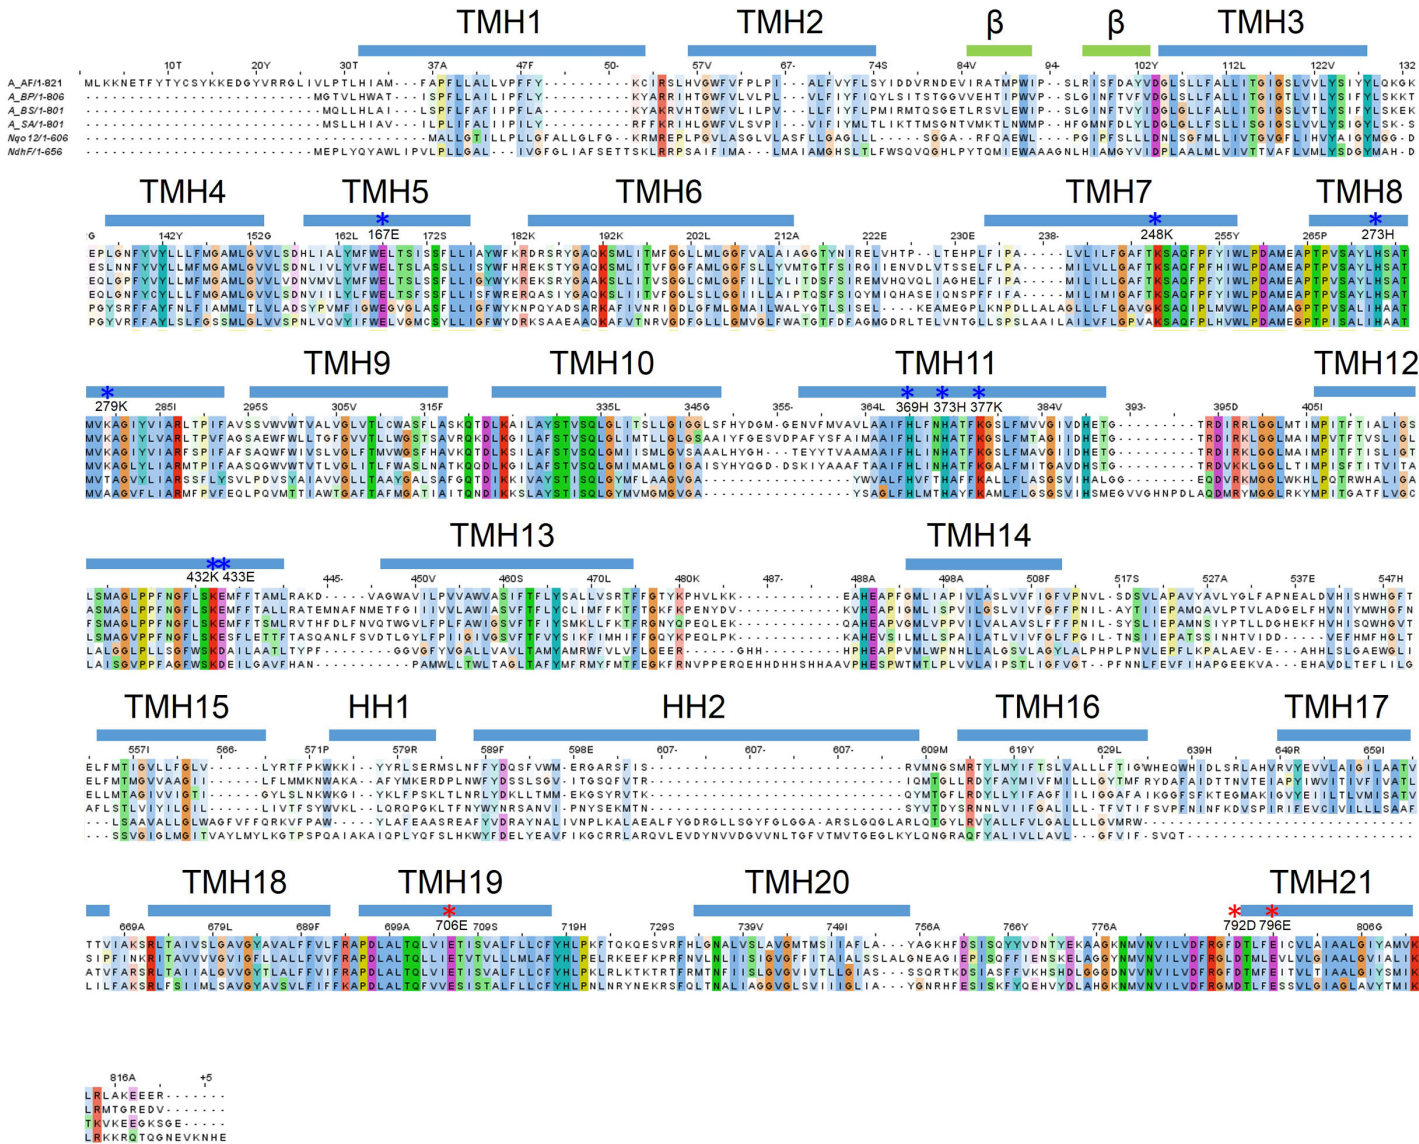

MrpB

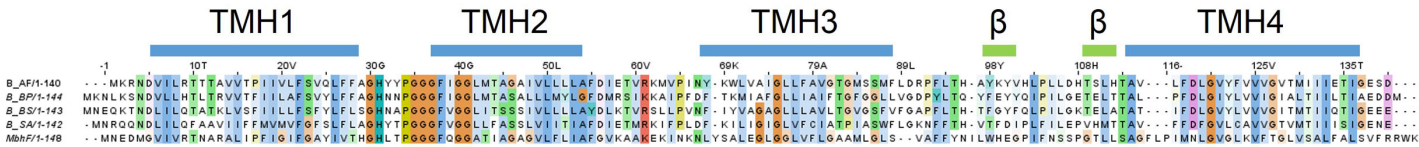

MrpC

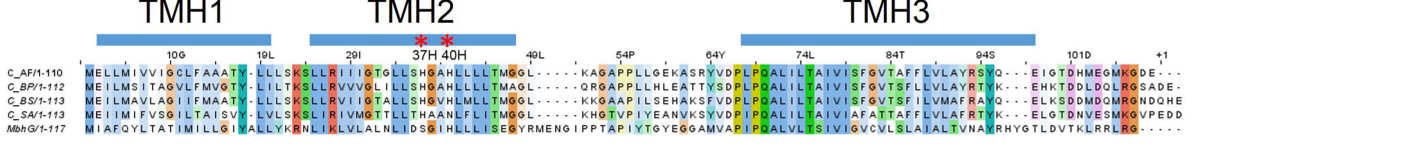

Supplement: supp [file elife-59407-supp-v1.zip › elife_poa_e59407_Figure_4_figure_supplement_3.pdf]
